# Supplementary material for: ASYMMETRIC LEAVES1 regulates abscission zone placement in Arabidopsis flowers
Source: PubMed Central journal article supplement (PMC4223632; doi:10.1186/s12870-014-0195-5), 2014-07-20
Supplement: s12870-014-0195-5-S2.pdf [file s12870-014-0195-5-S2.pdf]

**Table S2. AS1 oligos used in this study.**

| <b>Purpose</b>              | <b>Sequence</b>                 |
|-----------------------------|---------------------------------|
| as1-20 genotyping           | 5'-GAGAGACAACGTTGGAGTGGTGAAG-3' |
| “                           | 5'-CAGCAGCAGGGACAACGTTAGAC-3'   |
| Sequence analysis: region 1 | 5'-ATGAAAGAGAGACAACGTTGGAGTG-3' |
| “                           | 5'-GACGGTTCAGGGGCGGTCTAATC-3'   |
| Sequence analysis: region 2 | 5'-TCTGCTCTTCCTCTGTCAAAGACC-3'  |
| “                           | 5'-GGTTTTAAAGCCTCTCTCACTTTG-3'  |
| Sequence analysis: region 3 | 5'-AGACCATAAGAAAGAGGCTGCATG-3'  |
| “                           | 5'-TGAAGTGATAAATGGAACACAAAGG-3' |
